# Supplementary material for: High Glutathione and Glutathione Peroxidase-2 Levels Mediate Cell-Type-Specific DNA Damage Protection in Human Induced Pluripotent Stem Cells
Source: PubMed Central journal article supplement — Stem Cell Reports. 2015 Apr 30;4(5):886–98. doi: 10.1016/j.stemcr.2015.04.004 (PMC4437487; doi:10.1016/j.stemcr.2015.04.004), 2015-04-30
Supplement: mmc1.pdf [file mmc1.pdf]

**Stem Cell Reports, Volume 4**

**Supplemental Information**

**High Glutathione and Glutathione Peroxidase-2  
Levels Mediate Cell-Type-Specific DNA Damage  
Protection in Human Induced Pluripotent Stem Cells**

**Benjamin Dannenmann, Simon Lehle, Dominic G. Hildebrand, Ayline Kübler, Paula Grondona, Vera Schmid, Katharina Holzer, Mirjam Fröschl, Frank Essmann, Oliver Rothfuss, and Klaus Schulze-Osthoff**

## Supplementary Figures

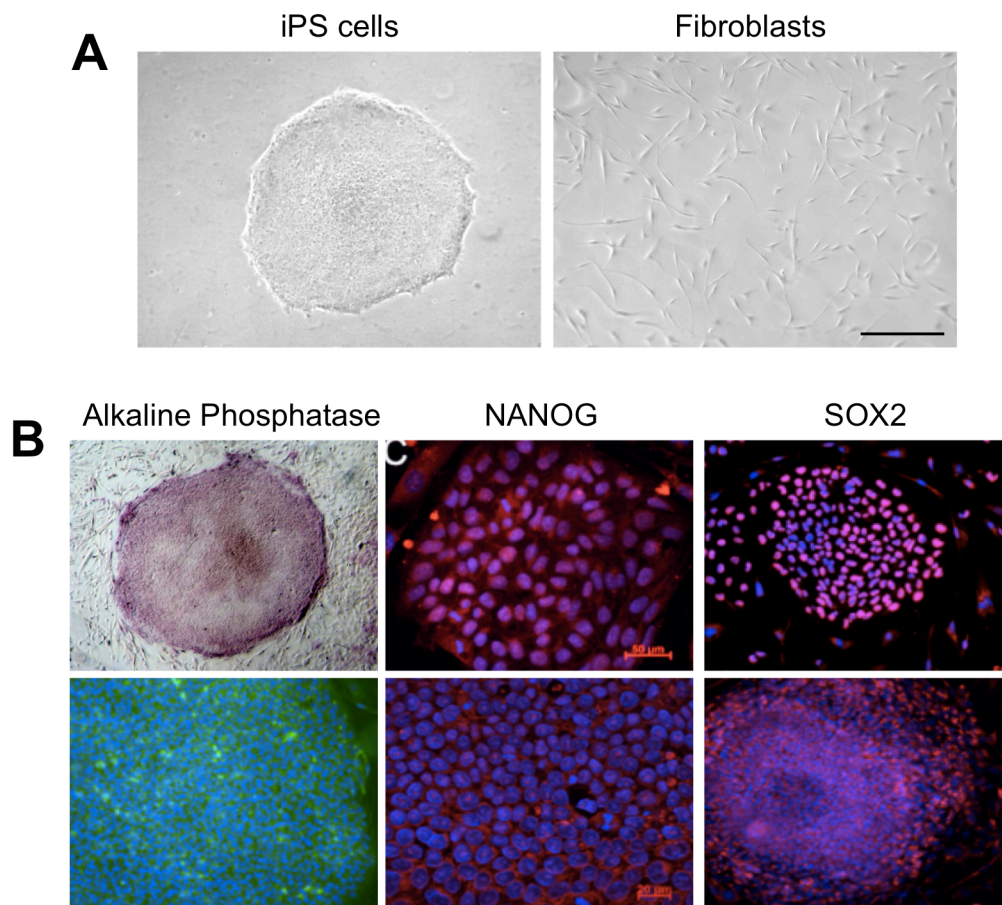

**Figure S1: Characterization of employed human iPS cells and fibroblasts.**

(A) Microscopical images of human dermal fibroblasts and iPS cells that were generated by retroviral transduction with *OCT4*, *SOX2*, *KLF4* and *c-MYC*. Scale bar = 200  $\mu$ M.

(B) Alkaline phosphatase staining and expression of pluripotency markers NANOG, SOX2, TRA1-60, TRA1-81, and SSEA-4. Nuclei were visualized by blue DAPI staining. Exemplarily, L2 iPS cells (P25) and fibroblasts (P7) are shown.

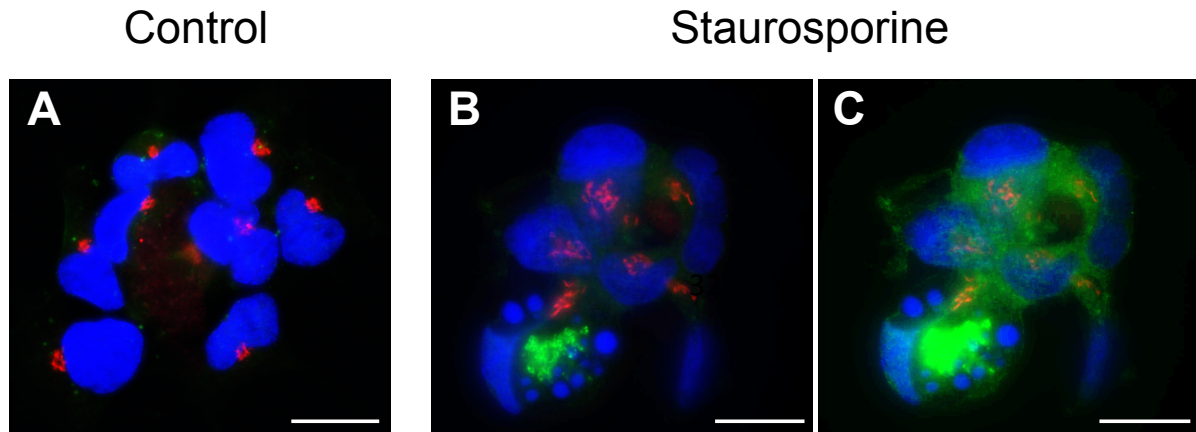

**Figure S2: Human iPS cells do not maintain a constitutively active form of BAX at the Golgi.**

Human iPS (iPSC L1) cells were either left untreated (A) or stimulated with 100 nM staurosporine (B, C) for 2 h to undergo apoptosis. Immunohistochemistry reveals that active Bax (green staining) is hardly detectable in healthy untreated cells and not present at the Golgi (red staining). An apoptotic cell shown in (B) reveals typical BAX clustering and nuclear fragmentation (blue staining). A brighter illumination of the picture (C) shows in pre-apoptotic cells an even cytosolic distribution of BAX but no localization at the Golgi. Scale bar = 20  $\mu$ M. For indirect immunofluorescence cells were fixed in 4% formaldehyde and permeabilized in immunofluorescence buffer (PBS, 4% BSA, 0.05% saponin) for 1 h followed by over-night incubation at 4°C with conformation-specific anti-BAX-NT and the Golgi marker anti-GM130. Subsequently cells were washed and secondary antibodies were applied for 3 h at RT. Nuclei were stained for 5 min in PBS containing DAPI (10 ng/mL).

## Supplementary Tables

**Table S1: List of primary antibodies.**

| Specificity                 | Origin  | Provider                     | Cat #/Address                    |
|-----------------------------|---------|------------------------------|----------------------------------|
| Actin                       | Mouse   | Sigma                        | A2228                            |
| Anti-mouse Alexa Fluor 488  | Chicken | Invitrogen                   | A-21200                          |
| Anti-mouse Alexa Fluor 568  | Rabbit  | Invitrogen                   | A-11061                          |
| Anti-mouse Alexa Fluor 647  | Chicken | Invitrogen                   | A-21463                          |
| Anti-rabbit Alexa Fluor 594 | Chicken | Invitrogen                   | A-21442                          |
| Anti-rat Alexa Fluor 488    | Chicken | Invitrogen                   | A-21470                          |
| BAD                         | Mouse   | BD Transduction Laboratories | 610391                           |
| BAK                         | Rabbit  | Millipore (Upstate)          | 06-536                           |
| BAX                         | Mouse   | Trevigen                     | 2281-MC                          |
| BAX-NT (active BAX)         | Rabbit  | Millipore (Upstate)          | 06-499                           |
| BCL-2                       | Mouse   | Santa Cruz                   | sc-7382                          |
| Bcl-X                       | Rabbit  | BD                           | 610212                           |
| BID                         | Goat    | R&D                          | AF860                            |
| BIM                         | Rabbit  | Stressgen                    | ADI-AAP-330-E                    |
| GM130                       | Rabbit  | Abcam                        | EP892Y                           |
| GPX2                        | Rabbit  | Anna P. Kipp                 | DIFE, Postdam-Rehbrücke, Germany |
| GSTA2                       | Rabbit  | John Hayes                   | University of Dundee, UK         |
| MCL-1                       | Mouse   | BD Pharmingen                | 559027                           |
| NANOG                       | Rabbit  | Abcam                        | ab21624                          |
| p53                         | Mouse   | Calbiochem                   | OP43                             |
| Sox2                        | Rabbit  | Abcam                        | ab59776                          |
| SSEA-4                      | Rat     | Chemicon                     | MAB4303                          |
| TRA1-60                     | Mouse   | Chemicon                     | MAB4360                          |
| TRA1-81                     | Mouse   | Chemicon                     | MAB4381                          |

**Table S2: LORD-Q primers applied in DNA damage quantification experiments.**

| <b>Locus</b>           | <b>Base pairs</b> | <b>Efficiency</b> | <b>Primer Denotation</b> | <b>Primer Sequence</b>     |
|------------------------|-------------------|-------------------|--------------------------|----------------------------|
| mtDNA (L)              | 3724              | 1.643             | CL5.F                    | 5'-ATCGTAGCCTTCTCCACTTC-3' |
|                        |                   |                   | AS2.R                    | 5'-TGGTTAGGCTGGTGTTAGGG-3' |
| mtDNA (S)              | 50                | 1.989             | AS2.F                    | 5'-GGCCACAGCACTTAAACACA-3' |
|                        |                   |                   | AS2.R                    | 5'-TGGTTAGGCTGGTGTTAGGG-3' |
| nDNA: <i>GAPDH</i> (L) | 3653              | 1.660             | <i>GAPDH</i> .F (1598)   | 5'-AGTCCCCAGAAACAGGAGGT-3' |
|                        |                   |                   | <i>GAPDH</i> .R (5250)   | 5'-GGCTGAGCTCCACTAACCAG-3' |
| nDNA: <i>GAPDH</i> (S) | 45                | 1.995             | <i>GAPDH</i> .F (4076)   | 5'-GCCTCACTCCTTTTGCAGAC-3' |
|                        |                   |                   | <i>GAPDH</i> .R (4128)   | 5'-GTCTTCTGGGTGGCAGTGAT-3' |
| nDNA: <i>TP53</i> (L)  | 3075              | 1.649             | <i>TP53</i> .F           | 5'-CATAACCGCAAATGGGAAAC-3' |
|                        |                   |                   | <i>TP53</i> .R (3075)    | 5'-CGGGACGTGAAAGGTTAGAA-3' |
| nDNA: <i>TP53</i> (S)  | 45                | 1.991             | <i>TP53</i> .F           | 5'-CATAACCGCAAATGGGAAAC-3' |
|                        |                   |                   | <i>TP53</i> .R (45)      | 5'-CGTCCTTTTGATGGCCTTT-3'  |

**Table S3: Primers used in qRT-PCR experiments.**

|                |                               |
|----------------|-------------------------------|
| <i>ACTB.F</i>  | 5'-CATGTACGTTGCTATCCAGGC-3'   |
| <i>ACTB.R</i>  | 5'-CTCCTTAATGTCACGCACGAT-3'   |
| <i>ALAS1.F</i> | 5'-CGCCGCTGCCATTCTTAT-3'      |
| <i>ALAS1.R</i> | 5'-TCTGTTGGACCTTGGCCTTAG-3'   |
| <i>CAT.F</i>   | 5'-TGTTGCTGGAGAATCGGGTTC-3'   |
| <i>CAT.R</i>   | 5'-TCCCAGTTACCATCTTCTGTGTA-3' |
| <i>GAPDH.F</i> | 5'-GGAGCGAGATCCCTCCAAAAT-3'   |
| <i>GAPDH.R</i> | 5'-GGCTGTTGTCATACTTCTCATGG-3' |
| <i>GCLC.F</i>  | 5'-GGAGGAAACCAAGCGCCAT-3'     |
| <i>GCLC.R</i>  | 5'-CTTGACGGCGTGGTAGATGT-3'    |
| <i>GCLM.F</i>  | 5'-TGTCTTGGAATGCACTGTATCTC-3' |
| <i>GCLM.R</i>  | 5'-CCCAGTAAGGCTGTAAATGCTC-3'  |
| <i>GDF3.F</i>  | 5'-GCCATCAAAGAAAGGGAACA-3'    |
| <i>GDF3.R</i>  | 5'-TCTGGCACAGGTGTCTTCAG-3'    |
| <i>GPX1.F</i>  | 5'-CAGTCGGTGTATGCCTTCTCG-3'   |
| <i>GPX1.R</i>  | 5'-GAGGGACGCCACATTCTCG-3'     |
| <i>GPX2.F</i>  | 5'-GGTAGATTTCAATACGTTCCGGG-3' |
| <i>GPX2.R</i>  | 5'-TGACAGTTCTCCTGATGTCCAAA-3' |
| <i>GPX3.F</i>  | 5'-AGAGCCGGGGACAAGAGAA-3'     |
| <i>GPX3.R</i>  | 5'-ATTTGCCAGCATACTGCTTGA-3'   |
| <i>GPX4.F</i>  | 5'-GAGGCAAGACCGAAGTAACTAC-3'  |
| <i>GPX4.R</i>  | 5'-CCGAAGTGGTTACACGGGAA-3'    |
| <i>GPX7.F</i>  | 5'-CCCACCACTTTAACGTGCTC-3'    |
| <i>GPX7.R</i>  | 5'-GGCAAAGCTCTCAATCTCCTT-3'   |
| <i>GSR.F</i>   | 5'-TTCCAGAATACCAACGTCAAAGG-3' |
| <i>GSR.R</i>   | 5'-GTTTTTCGGCCAGCAGCTATTG-3'  |
| <i>GSTA1.F</i> | 5'-CTGCCCGTATGTCCACCTG-3'     |
| <i>GSTA1.R</i> | 5'-AGCTCCTCGACGTAGTAGAGA-3'   |
| <i>GSTA2.F</i> | 5'-TACTCCAATATACGGGGCAGAA-3'  |
| <i>GSTA2.R</i> | 5'-TCCTCAGGTTGACTAAAGGGC-3'   |
| <i>GSTA4.F</i> | 5'-CCGGATGGAGTCCGTGAGAT-3'    |
| <i>GSTA4.R</i> | 5'-GGGCACTTGTGGAACAGC-3'      |
| <i>GSTM1.F</i> | 5'-TCTGCCCTACTTGATTGATGGG-3'  |
| <i>GSTM1.R</i> | 5'-TCCACACGAATCTTCTCCTCT-3'   |
| <i>GSTM2.F</i> | 5'-TGTGCGGGGAATCAGAAAAGG-3'   |
| <i>GSTM2.R</i> | 5'-CTGGGTCATAGCAGAGTTTGG-3'   |
| <i>GSTM3.F</i> | 5'-TCGTGCGAGTCGTCTATGGT-3'    |
| <i>GSTM3.R</i> | 5'-TCTCCTCATAAGAGGTATCCGTG-3' |
| <i>GSTM4.F</i> | 5'-AGAGGAGAAGATTTCGTGTGGA-3'  |
| <i>GSTM4.R</i> | 5'-TGCTGCATCATTGTAGGAAGTT-3'  |
| <i>GSTM5.F</i> | 5'-CCATCCTGCGCTACATTGC-3'     |
| <i>GSTM5.R</i> | 5'-CCAGCTCCATGTGGTTATCCAT-3'  |
| <i>GSTO1.F</i> | 5'-GAACGGCTGGAAGCAATGAAG-3'   |
| <i>GSTO1.R</i> | 5'-TGCCATCCACAGTTTCAGTTT-3'   |

|                |                               |
|----------------|-------------------------------|
| <i>GSTO2.F</i> | 5'-TGCCCCTATTCTCACAGGACC-3'   |
| <i>GSTO2.R</i> | 5'-TCCAGGTACTCACAAGCAATAAC-3' |
| <i>GSTT1.F</i> | 5'-TGCCGCGCTGTTTACATCTT-3'    |
| <i>GSTT1.R</i> | 5'-GTGCTGACCTTTAATCAGATCCA-3' |
| <i>GSTT2.F</i> | 5'-TGGCATCCCCTTAGAGCTG-3'     |
| <i>GSTT2.R</i> | 5'-CTTGAGCGTCGGCAGTTTC-3'     |
| <i>GSTZ1.F</i> | 5'-GCCCAGAACGCCATCACTT-3'     |
| <i>GSTZ1.R</i> | 5'-CTACACAGTATATGCCCGCTG-3'   |
| <i>MGST1.F</i> | 5'-ATGACAGAGTAGAACGTGTACGC-3' |
| <i>MGST1.R</i> | 5'-TACAGGAGGCCAATTCCAAGA-3'   |
| <i>MGST2.F</i> | 5'-TCGGCCTGTCAGCAAAGTTAT-3'   |
| <i>MGST2.R</i> | 5'-TGCCCGAAATACTCTCTCAAAC-3'  |
| <i>MGST3.F</i> | 5'-GGCCACCTAGCCATCAATG-3'     |
| <i>MGST3.R</i> | 5'-CGCTGAATGCAGTTGAAGATGT-3'  |
| <i>NANOG.F</i> | 5'-ACTCTCCAACATCCTGAACCTC-3'  |
| <i>NANOG.R</i> | 5'-GCCTTCTGCGTCACACCA-3'      |
| <i>PRDX1.F</i> | 5'-CATTCTTTGGTATCAGACCCG-3'   |
| <i>PRDX1.R</i> | 5'-CCCTGAACGAGATGCCTTCAT-3'   |
| <i>PRDX2.F</i> | 5'-GAAGCTGTCGGACTACAAAGG-3'   |
| <i>PRDX2.R</i> | 5'-TCGGTGGGGCACACAAAAG-3'     |
| <i>PRDX3.F</i> | 5'-GAGACTACGGTGTGCTGTTAGA-3'  |
| <i>PRDX3.R</i> | 5'-GTTGACGCTCAAATGCTTGATG-3'  |
| <i>PRDX4.F</i> | 5'-AGAGGAGTGCCACTTCTACG-3'    |
| <i>PRDX4.R</i> | 5'-GGAAATCTTCGCTTTGCTTAGGT-3' |
| <i>PRDX6.F</i> | 5'-GTTGCCACCCCAGTTGATTG-3'    |
| <i>PRDX6.R</i> | 5'-TGAAGACTCCTTTCGGGAAAAGT-3' |
| <i>SOD1.F</i>  | 5'-GGTGGGCCAAAGGATGAAGAG-3'   |
| <i>SOD1.R</i>  | 5'-CCACAAGCCAAACGACTTCC-3'    |
| <i>SOD2.F</i>  | 5'-GCTCCGTTTTTGGGGTATCTG-3'   |
| <i>SOD2.R</i>  | 5'-GCGTTGATGTGAGGTTCCAG-3'    |
| <i>SOD3.F</i>  | 5'-ATGCTGGCGCTACTGTGTTTC-3'   |
| <i>SOD3.R</i>  | 5'-CTCCGCCGAGTCAGAGTTG-3'     |
| <i>TMX1.F</i>  | 5'-AGTATGTCAGCACTCTTTCAGC-3'  |
| <i>TMX1.R</i>  | 5'-CACACTGGCAATCCAAGGTCT-3'   |
| <i>TXN.F</i>   | 5'-GTGAAGCAGATCGAGAGCAAG-3'   |
| <i>TXN.R</i>   | 5'-CGTGGCTGAGAAGTCAACTACTA-3' |
| <i>TXNIP.F</i> | 5'-GGTCTTTAACGACCCTGAAAAGG-3' |
| <i>TXNIP.R</i> | 5'-ACACGAGTAACTTCACACACCT-3'  |
